# Supplementary material for: Genomic Selection for Growth Traits in Pacific Oyster (Crassostrea gigas): Potential of Low-Density Marker Panels for Breeding Value Prediction
Source: PubMed Central journal article supplement (PMC6156352; doi:10.3389/fgene.2018.00391), 2018-09-19
Supplement: Image_1.pdf [file Image_1.pdf]

Figure S1. Manhattan plots showing the GWAS results for A) Shell height B) Shell length and C) Wet weight.

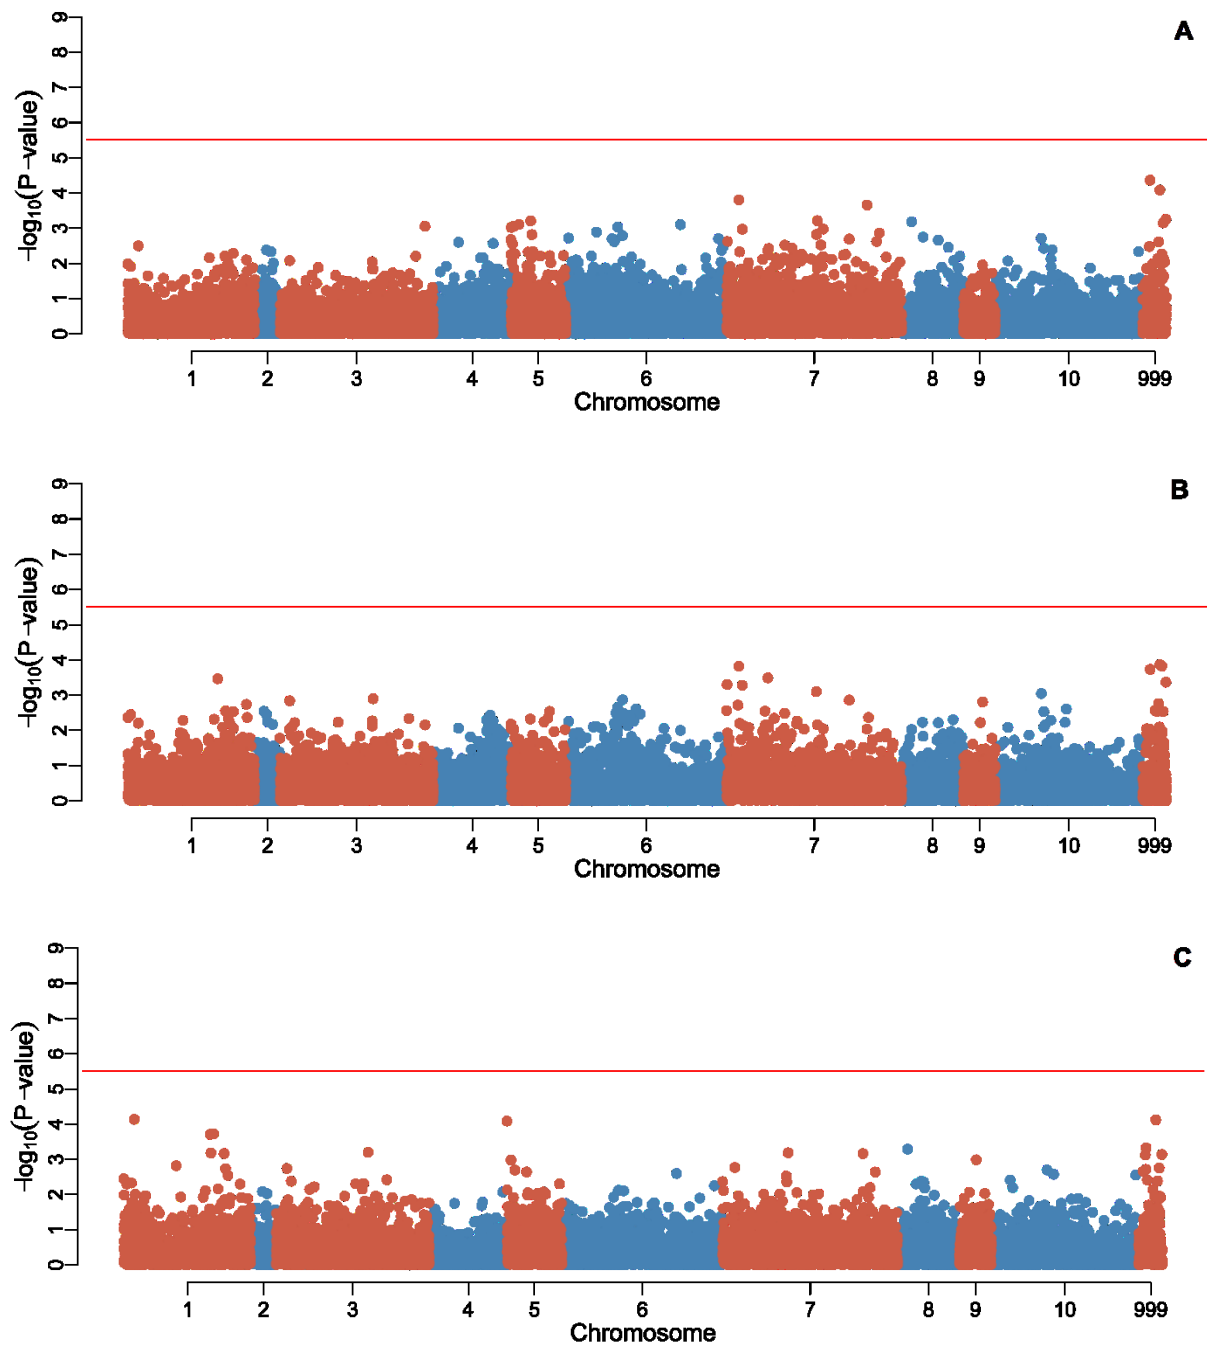

Markers sorted according to the 10 *C. gigas* linkage groups (LG) described in Gutierrez et al. (2018). LG shown as "999" correspond to markers not assigned to any LG.
