# Supplementary material for: Genomic Selection for Growth Traits in Pacific Oyster (Crassostrea gigas): Potential of Low-Density Marker Panels for Breeding Value Prediction
Source: Front Genet. 2018 Sep 19;9:391. doi: 10.3389/fgene.2018.00391 (PMC6156352; doi:10.3389/fgene.2018.00391)
Supplement: Supplementary file 2 [file Image_2.pdf]

Figure S2. Manhattan plots showing the GWAS results from BLUPF90 using a 10SNP window for A) Shell height B) Shell length and C) Wet weight.

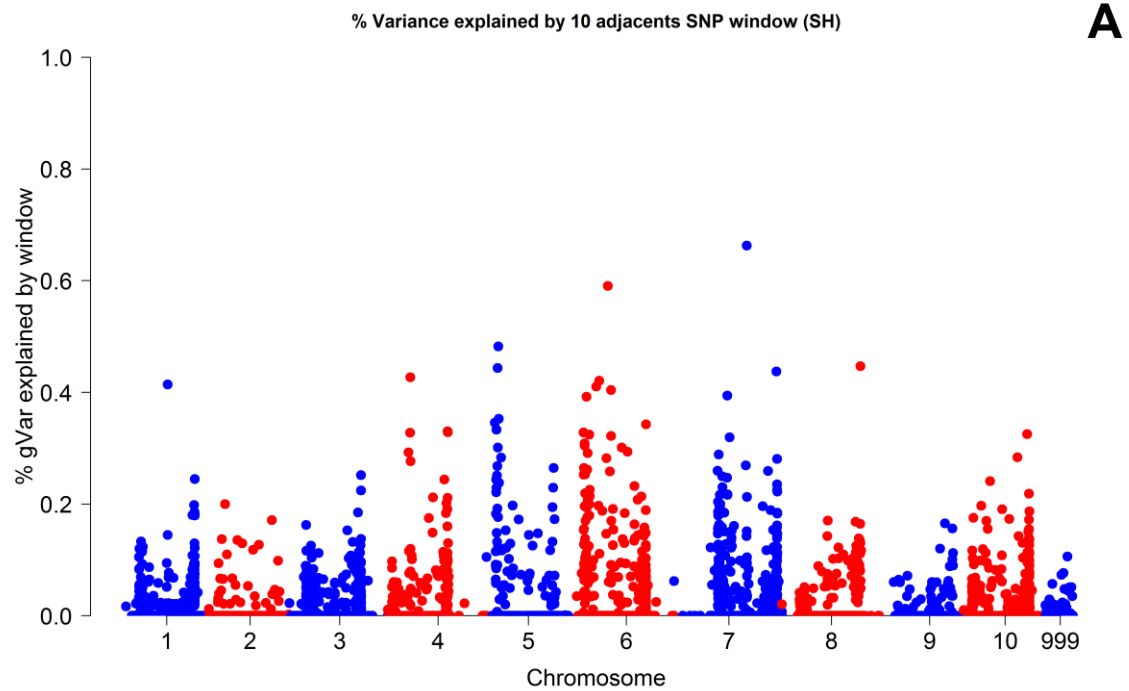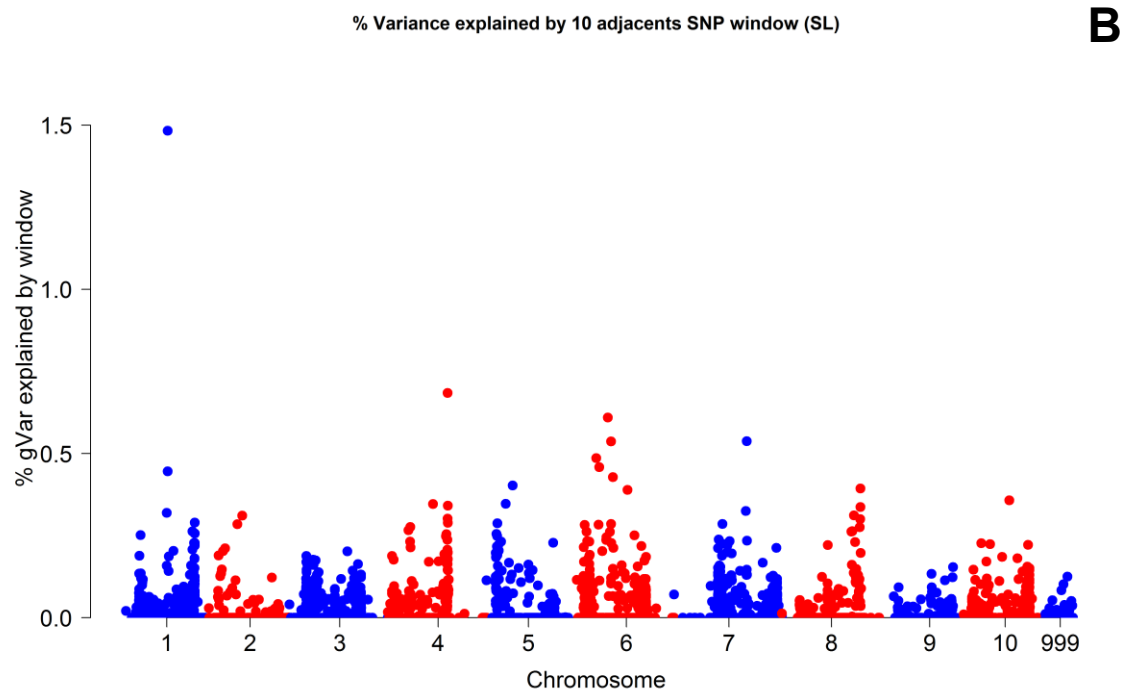

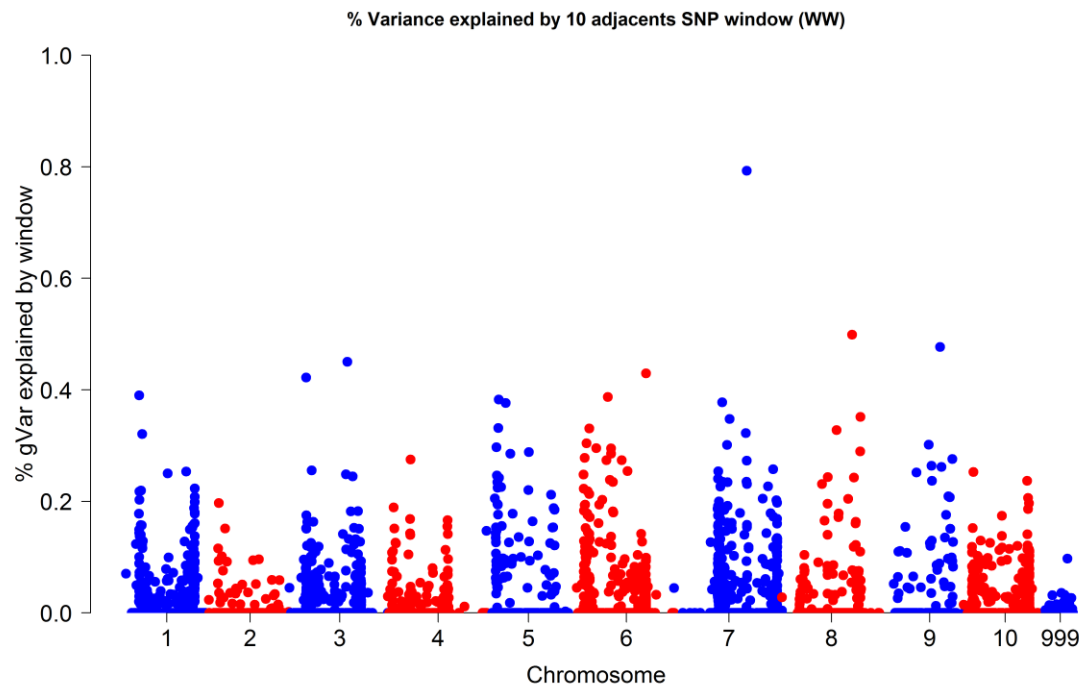

Markers sorted according to the 10 *C. gigas* linkage groups (LG) described in Gutierrez et al. (2018). LG shown as "999" correspond to markers not assigned to any LG.
